# Supplementary material for: A ChIP-Seq Data Analysis Pipeline Based on Bioconductor Packages
Source: PubMed Central journal article supplement — Genomics Inform. 2017 Mar 29;15(1):11–8. doi: 10.5808/GI.2017.15.1.11 (PMC5389943; doi:10.5808/gi.2017.15.1.11), 2017-03-29
Supplement: gni-15-11-s005.pdf [file gni-15-11-s005.pdf]

## SUPPLEMENTARY INFORMATION

### **A ChIP-Seq Data Analysis Pipeline Based on Bioconductor Packages**

**Seung-Jin Park<sup>1,2</sup>, Jong-Hwan Kim<sup>1,2</sup>, Byung-Ha Yoon<sup>1,2</sup>, Seon-Young Kim<sup>1,2\*</sup>**

<sup>1</sup>Personalized Genomic Medicine Research Center, Korea Research Institute of Bioscience and Biotechnology (KRIBB), Daejeon 34141, Korea,

<sup>2</sup>Department of Functional Genomics, University of Science and Technology (UST), Daejeon 34113, Korea

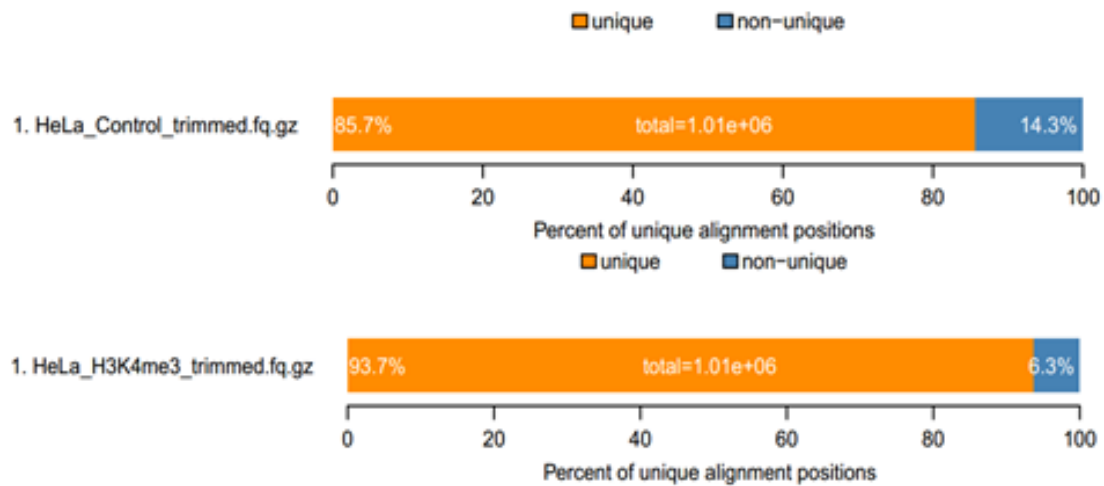

**Supplementary Fig. 4.** Library complexity. It shows the fractions of unique and non-unique read alignment positions. This measure is not independent of the total number of reads in a library. The percentages of unique mapped reads are 85.7% and 93.7%, respectively.
